# Supplementary material for: Characterization of Redox Sensitive Brown Algal Mannitol-1-Phosphatases
Source: MDPI journal article supplement (doi:10.3390/phycology3010001), 2022-12-23
Supplement: s1 [file s1]

**Supplementary File S1.** List of brown algal M1Pase sequences used for the phylogenetic analysis, and for the prediction of subcellular localization and presence of peptide signal (Fig. 4).

>EsM1Pase1

MAMKRTIQAAVLCYHTGATAFLVSTSSLLSRPLSAATTAHVSAVRHRRWQQQQQRTARGPTGLSAVEGEEEE  
LTDEEKLRRSRLAEDFGANVEVDPKRVAVLDFDFGTIGDTETPAMEVAYWELAPYFPEAAKGGELDTLEYVRNNA  
GKAFFMLEVVEEDRKAQGLPDIATARAEGAEDPKIMKVVDARAKYGLKPLGELRAAGTLKDILTQQKEETVDAL  
SVVARPVEGMVDTLDELKARKVPFAIATTSPKPRVPASVHACGLDDYFPADKIHSGESDFDPPRFKPDPSVYLRAA  
QYEGVIPPICVAVEDSASGVGSAAFAAEMGLIVGYVGASHISEERKTEHAKMLRVRGARVVVDNMRDLIPLVDCFE  
CMAKGEDFCLPIANVIKNMDRKTVWE

>Cok\_S\_s015\_4686.t1

MRFLQAAVLCYHRGATAFILSSSSSSASSLRRATPTAHVSTAAQQQQQQQQHQQQRRPATGGATVGLRAAA  
ADGEDAGGLTDEERAIKALLKEDFGANVEVDPKRVAVLDFDFGTIGDTETPAMEVAYWELAPYFPQAAKGGEM  
VDMSEFVRNNAAGKAFFMLEVVEEDRKAAGLPDIATARAEEAEDPKIMETVDAARAKYGLKSLGELRAAGALKDIL  
TQQKEETVDALSIVARPDGMVETLDELARKLPFAIATTSPKPRVPASVHACGLDDYFPADKIHSGESDFDPPRFK  
PNPSVYLRAAQYEGAIPPLCVAVEDSASGVGSAYAAEMGLIVGYVGASHISEARKNEHAKMLRVRGARVVVNDM  
KDLIPLVDCFTECMAKGEDYCLPIAN  
LLRTMKGRVWD

>EsM1Pase2

MEKAKAFDKMSILDFDFGTIGDTETPAMEVAFWELAPYLPDTPDKLDGLMPEFVRDNAGKAFFMVEKVEDR  
KAAGLSTISEAFAAKSEPKEMLDAVDPHRKKFGLKTFaelRAPDGGEKENLLIQQTETVDALSIAQPCNGVPEVL  
AALTAAGVAFICISTTSPKPRVPASITACKLDEYFPADKVHSGESDFDPPRFKPNPSVYLKAAETEGKEPANCIAVEDS  
GSGVGSASNAGVGLTVGYVGASHIPDYKKDTHAEMLMSSGGAENGKGAEIVISDMTDLPKVIEFFAGEKIAGKSA  
PFDPFEEELISSLKQPVVWHSTKA

>Cok\_S\_s007\_3451.t1

MERAKAFDKMSILDFDFGTIGDTETPAMEVAFWELAPYLVNTPPEKLDGLMPEFVRDNAGKAFFMVEKVEDR  
KAAGLGTIAEMFAAKSEPKEMLDAVDPHRTKFGKTFaelRAPDGGEKENLLIQQTETVDALSIAQPCNGVPEV  
LAALTAAGVPFCISTTSPKPRVPASITACKLDEYFPADKVHSGESDFDPPRFKPNPSVYLKAAETEGKDPVNCAVEDS  
GSGVGSASNAGVGLIVGYVGASHIPEFKDTHAEMLMAGGRAENGKGAEIVISDMTDLKVIDFFAGEKTAGKSA  
PFEFPADLISSLKQPVVWHGAKA

>SjaM1Pase2

MEQATANKDISILDFDFGTIGDTETPAMEVAFWELAPYLPDTPDKLDNLMPEFVRDNAGKAFFMVEKVEDR  
AAGMDSVEEMFAAKSEPKQNMLDAVDPHRKKFGLKSFAELRAPEGGEAATLLIQQTETVDALSIAQPCNGVREV  
LAALTAATVPFCISTTSPKPRVPASITACGLDEYFPDPKVHSGESDFDPPRFKPNPSVYLKAAETEGKEPVNCAVEDS  
GSGVGSASNAGVGLTVGYVGASHIPEYKKDTHAEMLMAGGRAENGKGAEIVISDMKDLLKIIDFFAGAKTAGKLA  
PFDFTAMVASMQQPV  
WVHGKKA

>SjaM1Pase1

MRRTFQAAVLCYHRSATAFVSPSAALPSRTSALRRSSTSHSSWVLPQQQVLNEQREQRH  
AATALRAGLDGDGSDAEAAAMKLLQEDFGANVAVDPKRVAVLDFDFGTIGDTETPAMEVA  
YWELAPYFPGAATGGELVDMSEYVRNNAAGKAFFMLEVVEADRKEQGLPDIATARAESAE  
NPEIMKVVDARAKYGLKPLGLDLRAAGTLKDILTQQKEETVDALSIVARPVEGMVNALDE  
LRARKLPFAIATTSPKPRVPASIHACGLDDYFPADKVHSGESDFDPPRFKPDPSVYLKAA  
QFEGALPLPCVAVEDSASGVGSAYAAEMGLIVGYVGASHISASRKSEHAKMLRHRGARVV  
VDEMKDITLVDCFAECMAKGEDFCLPIANVINTLDPKRVWG

>QLMZ-2016866\_Csin

MSLDKAKAFDKMSILDFDFGTIGDTETPAMEVAFWELAPYLPETTPDKLDGLMPEFVRDN  
AGKAFFMVEKVEEDRKAAGMCTIEEAFKAKSEPKEMLDAVDPHRKKFGLKTFaelRAEG  
GGEKENLLIQQTETVEALSIAQPCNGVPEVLAALTAAGVAFICISTTSPKPRVPASXFP  
ADKVHSGESDFDPPRFKPNPSVYLKAAETEGKEPVNCAVEDSGSGVGSASNAGVGLTVG

YVGASHIPDYKKDTHAEMLMAGGRAENGKGAEIVISDMSDLLKVIDFFAGEKTAGKSAPF  
EFPPDLVASMKQPWWVHGKKAQVEASA

>QLMZ-2008139\_Csin

MVMKRTMQAAAVLCYHRGATAFVLSSSSASLLRRAPSTAGSTAAHVSASHSQQRRLSLP  
ARAAAARVTALGAGAEGGEAQEDGLTDEERAMKALLKEDFGANVEVDPKRVAVLFDGDT  
IGDTETPAMEVAYWELAPYFPEAAKGGKLTDLTEYVRNAGKAFFMLEVVEEDRKAAGL  
PDIATARADGAEDPEIMKVVDEARAKYGLKPLGELRAAGTLKDILTQQKEETVEALSVVA  
RPVEGMVNTLDELKARKLPFAIATTSPKPRVPASVHACGLDDYFPADKIHSGESDFDPPR  
FKPDPSVYLRAAQYEGALPPLCVAVEDSASGVGSAYAAEMGLIVGYVGASHISEARKNEH  
AKMLRVRGARVVVNDMKDILVDCFTECMAKGEDFCLPIANLIQTMDKKRVWE

>FSQE-2051711\_Dvir

MEKAAANKDISILFDGTVGDTETPAMEVAFWELGPYLANTPDKLDSLMPEFVRDNAG  
KAFFMVFETANEDRKAAGLCSVEEMFAAKSEPQDMLDAIDPHRKKFGLKTFaelRAPGGG  
ERENLLVQKKTETVDALSKIAQPCNGVREVLATLTSSGVPCISTTSPKPRVPASITACG  
LDEYFPADKIVHSGESDFDPPRFPKPDPSVYLKAAKTEGKDPVNCAVEDSGSGVGSASNAG  
VGLTVGYVGASHIPDYKKDTHAEMLMAGGRAENGKGAEIVISDMTDLLKIIFFAGEKTA  
GKSAPFEFSDLVSLKQPWWVHGQKA

>FSQE-2003898\_Dvir

MRRSVQAVVLLCSYRGASAFFSTAVPRASSSLRRTSAPTSSPAHSQQQRQSVVSSASSCV  
PVAIAARQSQUALRAGGGGDDGEAKVVEDFGANVEVDMKRVAVLFDGDTIGDTETPAMEV  
AFWELAPYFPEAATGGKLEDMPYIRNAGKAFFMLEKVEEDRKTAGLSDIATVRAEAG  
ENAEIMKVVNDENRAKYGLKPLGELRASGDLRDILTQQKVETVDALSVVARPVEGMVNTLD  
ELRARKIPFAIATTSPKPRVPASVTACGLDDYFPGDKIHSGESDFDPPRFPKPDPSVYLKA  
AQFEGAIPPLCVAVEDSASGVGSADAAEMGLIVGYVGASHIGQARKQEHAKMLRTRGARV  
VVDDMKDILVLECFTCMAKGEDYCAPIAEVISTLDPKRTWG

>LIRF-2010393\_Dund

MLEKATANKNLSILFDGTVGDTETPAMEVAFWELGPYLVNTPPSKLESIMPEFVRDNA  
GKAFFMVDTTNEERKAAGMVSIEDMFAAKSEPQEMLDVDPHREKFGKLFADLRAEGG  
GEKENLLVQKKTETVDALSKIAQPCPGVPEVLAALRAAEVPFCIATTSPKPRVPASITAC  
GLDEYFPADKIVHSGESDFDPPRFPNPSVYLKAAETEGKEPANCIAVEDSGSGVGSASNA  
GVGLIVGYVGASHIPDFKKDTHAEMLMMSGAKSENGKGAEIVISDMSDLLKVINFFAGEKT  
EGKSPPDFPEELIESLKKPVWVQGKKA

>LIRF-2099575\_Dund

MVVVTPSPSVAMRRSIQVAAFLCTGRVSAFIASNLRVVSTLRQNSRSSSLFTFSSPHQQ  
EHQGGLCATVSSRRTGTIRAATGSDVEGLVTIEDFGSNVPVDKDRVAVLFDGDTIGDTE  
TPAMEVAYWELAPYFPAAAVGKELIDIREYVRNAGKAFFMLEKVEADRAAEGLPDIA  
VRAQAAEHPEIMKVVDEKRAEYGLKSLADLRASGELKDILTQQKEETVDALSVSRPVQG  
MEDTLKELNARTLPFAIATTSPKPRVPASVKACGLEGYFPDKIHSGESDFDPPRFPKDP  
SVYLKAAQFEGALPPLCVAVEDSLSGVGSAAANAGIGMIVGYVGASHITEAMKNEHAKSLR  
VRGARVVIEDMKNLIPVLECFAAGCMAGADYCEPIAKTIAQLPQKGVWE

>VRGZ-2087851\_Pfas

MSLDKAKAFDKMSILFDGTVGDTETPAMEVAFWELAPYLPDTPDKLDGLMPEFVRDN  
AGKAFFMVEKVEEDRKAAGMSTIEEAFKAKSEPKEMLDAVDPHKKFGLKTFaelRAEG  
GGEKEDLLIQKTETVEALSKIAQPCNGVPEVLAALTAAGVAFICISTTSPKPRVPASITA  
CKLDEYFPADKIVHSGESDFDPPRFPNPSVYLKAAETEGKEPVNCAVEDSGSGVGSASN  
AGVGLTVGYVGATHIPDFKMDTHAEMLMAGGRADNGKGAEIVISDMTDLLKIIDFFAGEK  
TAGKSAPFEFPPDLVSSLKKPVWVHGSKA

>VRGZ-2087949\_Pfas

MAMKRTMQAAAVLCYHRGASAFVLSSSPSSSLLRRASSRTTAVEAAAHVSASSSQQRRL  
RLGGVQPLSAEGEGEAQEDGLSDEERALRALLKEDFGANVEVDPKRVAVLFDGDTIGDT  
ETPAMEVAYWELAPYFPEAAKGGKLTDLTEYVRNAGKAFFMLEVVEEDRKTQGLPDIA

TARAEGAEDPEIMKVVD EARAKYGLKPLGELRAAGTLKDILTQQKEETVDALS VVARPVE  
GMVNALDELKARKLPFAIATTSPKPRVPASVHACGLDDYFPADKIHSGESDFDPPRFPKPD  
PSVYLRAAQYEGALPPLCVAVEDSASGVGSAYAAEMGLIVGYVGASHISESRKNEHAKML  
RTRGARVVVNDMKDLIPLVDCFTECMAKGEDFCLPIANLIRTM DTRVWE

>ASZK-2017609\_Plat

MEKAKAFDKMSILFDFDGTIGDTETPAMEVAFWELAPYLVDTPEKLD ELMPEFVRDNAG  
KAFEFMVEKVDEDRKAAGLGTIAXKEMLD AVDPHRQKFGLKTF AELRAPDGGEKENLLIQ  
QKTETVDALS KIAQPCNGVPEVLAALTAAGVAF CISTTSPKPRVPASITACKLDEYFPAD  
KVHSGESDFDPPRFPKPNPSVYLKAAETEGKEPVNCI AVEDSGSGVGSASNAGVGLTVGYV  
GASHIPDFKKDTHAEMLMAGGRAENGKGAEIVISDMTDLLKVIEFFAGEKTAGKSAPFEF  
PADLISSLKPPVWVHGAKA

>ASZK-2098041\_Plat

MRFLQAAAVLCYHRGATAFVLSSSSSVLRRATATAHVSTAAGAAAGQQQRHAGLQQGQ  
RRAVAAGATGLRAAEGEGAGEESGMTDEERA I KALLKEDFGANVEVDPKRVA VLFDFDGT  
IGDTETPAMEVAYWELAPYFPEAATGGNMVDMSEFVRNNAGKAFEFMLEVVEEDRKAAGL  
PDIATARAEEAEDPKIMETVDAARAKYGLKPLGELRAAGALKDILTQQKEETVDALS VVA  
RPVEGMVNTLDEL RARKLPFAIATTSPKPRVPASVHACGLDDYFPADKIHSGESDFDPPR  
FKPDPSVYLRAAQYEGAIPPLCVAVEDSASGVGSAYAAEMGLIVGYVGASHISEARKNEH  
AKMLRVRGARVVVNDMKNLIPLVDCFTECMAKGEDFCLPIANLVRTMEGVWE

>RAPY-2011301\_Sscu

MEKATANKDISILFDFDGTIGDTETPAMEVAFWELAPYLPDTPDKLDNLMPEFVRDNAG  
KAFEFMVETVDEERKAAGMDSVEEMFAAKSEPQNMLDAVDPHRKKFGLKSFAELRAPGGG  
EAATLLIQKTETVDALS KIAQPCNGVREVLAALTAATVPFCISTTSPKPRVPASITACG  
LDEYFPPDKVHSGESDFDPPRFPKPNPSVYLKAAETEGKEPVNCI AVEDSGSGVGSASNAG  
VGLTVGYVGASHIPEYKKDTHAEMLMAGGRAENGKGAEIVISDMKDLLKIIDFFAGAKTA  
GKTAPFDFSTDMVASMQQP VVWVHGKKA

>RAPY-2011639\_Sscu

MTPSHAANCRPHHTHTFHSSGTMRRTFQAAA VLCYHRSATAFVSPSAALPSRTAALRRSS  
TSRSSWLLPQEQGLNEQRHAASSATALRAGLDGDGSDAEAMKLLKEDFGANVAVDPKR  
VAVLFD DGTIGDTETPAMEVAYWELAPYFPGAATGGELVDMSEYVRNNAGKAFEFMLEV  
VEADRKEQGLPDIATARAESAENPEIMKVVD AERAKYGLKPLGDLRAAGTLKDILTQQKE  
ETVDALS VVARPVEGMVNALDEL RARKLPFAIATTSPKPRVPASIHACGLDDYFPADKVH  
SGESDFDPPRFPKPDPSVYLKAAQFEGALPPLCVAVEDSASGVGSAYAAEMGLIVGYVGAS  
HISASRKSEHAKMLRHRGARVVVDEM KDLITLVDCFAECMAKGEDFCLPIANVINTLDPK  
RVWG

>VYER-2086071\_Shem

MEKASAYKMSILFDFDGTIGDTETPAMEVAFWELAPYFPNTRPEQLEGLMPEFIRNNAG  
KAFEFMVEKVDEDRKSAGLGTVEEAFAAKSEPKEMLDATDPHR TKFGLKTF AELRAEGGG  
EAETILIQKTETVDALS KIAQPCPGVREVLVALREAGIAFCISTTSPKPRVPASITACG  
LDEYFPIEKVHSGESDFTPPEFKPSAVYLKAAKSEGKEPSNCI AVEDSGSGVGSASNAG  
VGLIVGYVGASHIKDDRKEAHAKMLMSGEKSKNGKGAEIVISNMKDLLKIIE LFAGERTA  
GKSSPFVFPKELVDSLSPKM WVWVHGGDAE

>VYER-2086141\_Shem

MKYSSRTMRLAVVALFSQRSATAFIVSSSPHSSYFSALASRATSTVAAVDSVSEASSLRK  
AGKQHRNGARALDSMPGSSHGRATSVLCAIPGGFTDAESALKKLMEEDFGANVEVDPKR  
VAVLFD DGTIGDTETPAMEVAYWELAPYFPAAAKGEELQDMSEFIRNNAGKAFEFMLEVC  
EEERKAAGLPDIATVRAEEAEDPEIMKIVDENRAKYGLKPLEELRAAGALKDILTQQKEE  
TVEALSVVARPTEGMVEALDELKRNLPFAIATTSPKPRVPASVHACGLDNYFPPEKIHS  
GESDFNPPRFPKPDPSVYLKAAQFEGVLPPLSVAVEDSASGVGSADAADMGMIVGYVGASH  
ITDERKAEHANTLRLRGARVVINNMKDLIPLVDCFNECMSKGEDYCAPIAKVIETLDKDS  
VWE

>FIKG-2008421\_Shen

MEKASAYKDMSILFDFDGTIGDTETPAMEVAFWELAPYFPNTSPEQLESLMPEFIRNNAG  
KAFEFMVEKVNEDRKSAGLGTVEEFAAKSESKEMLDATDPHRKKFGLKTFaelraeggg  
EAETILIQQKTETVDALSIAQPCPGVREVLVALREAGIAFCISTTSPKPRVPASITACG  
LDEYFPIEKVHSGESDFTPPEFKPSPAVYLKAAKSEGKEPSNCIAVEDSGSGVGSASNAG  
VGLIVGYVGASHIKDDRKEAHAKMLMSGEKSKNGKGAEIVISNMKDLLKIIELFAGERTA  
GKSTPFVFPQELVDSLSPVWVHGGDAE

>FIKG-2076836\_Shen

MKYSSRTMRLAAVALCSQRSAMGFIVSSSPHSSFSALASRATSTVAAVDSISEASSLRQ  
AGKQHRNGARTLDSMPGSSHGRATSALCAIPGGFTDAESALKKLMAEDFGANVEVDPKRV  
AVLFDFTIGDTETPAMEVAYWELAPYFPAAAKGEELQDMSEFIRNNAGKAFEFMLEVC  
EEDRKAAGLPDIATVRAEAAEDPEIMKIVDENRAKYGLKPLGELRAAGALKDILTQQKEE  
TVEALSVVARPTKGMVEALDELKKRNLPFAIATTSPKPRVPASVHACGLDDYFPPGKIHS  
GESDFNPPRFKPDPSVYLRAAQFEGVLPPLSVAVEDSASGVGSADAADMGMIVGYVGASH  
ITDERKAEHANTLRLRGARVINNMKDLIPLVDCFNECMAKGEDYCAPIAKVIETLDKDS  
VWE

>RWXW-2009468\_Shor

MEKASTYKDMSILFDFDGTIGDTETPAMEVAFWELAPYFPNTGPEQLEGLMPEFIRNNAG  
KAFEFMVEKVNEDRKSAGLGTVEEFAAKSEPKEMLDATDPHRKKFGLKTFaelraeggg  
EAETILIQQKTETVDALSIAQPCPGVREVLVALREAGIAFCISTTSPKPRVPASITACG  
LDEYFPIEKVHSGESDFTPPEFKPSPAVYLKAAKSEGKEPSNCIAVEDSGSGVGSASNAG  
VGLIVGYVGASHIKDDRKEAHAKMLMSGEKSKNGKGAEIVISNMKDLLKIIELFAGERTA  
GKSTPFVFPKELVDSLSPVWVHGGDAE

>RWXW-2074720\_Shor

MKYSSRTMRLAVVALFSQRSATAFIVSSSPHSSFSALASRAMSTVAAVDSVSEASSLRQ  
AGKQYRNEARALDMPGSSHGRTTSLCAIPGGFSDAESALKKLMAEDFGANVEVDPKRV  
AVLFDFTIGDTETPAMEVAYWELAPYFPAAAKGEELQDMSEFIRNNAGKAFEFMLEVC  
EEDRKAAGLPDIATVRAEAAEDPEIMKIVDENRAKYGLKPLGELRAAGELKDILTQQKEE  
TVEALSVVARPTKGMVEALDELKKRNLPFAIATTSPKPRVPASVHACGLDDYFPPGKIHS  
GESDFNPPRFKPDPSVYLKAAQFEGVLPPLSIAVEDSASGVGSADAADMGMIVGYVGASH  
ITDERKAEHANTLRLRGARVINNMKDLIPLVDCFNECMAKGEDYCAPIAKVIDTLDRDS  
VWE

>FOMH-2009194\_Sint

MEKASAYKDMSILFDFDGTIGDTETPAMEVAFWELAPYFPNTSPEQLESLMPEFIRNNAG  
KAFEFMVEKVNEDRKSAGLGTVEEFAAKSESKEMLDATDPHRKKFGLKTFaelraeggg  
EADTILIQQKTETVDALSIAQPCPGVREVLVALREAGVAFICISTTSPKPRVPASITACG  
LDEYFPIEKVHSGESDFTPPEFKPSPAVYLKAAKSEGKDPSNCIAVEDSGSGVGSASNAG  
VGLIVGYVGASHIKDDRKEAHAKMLMSGEKSKNGKGAEIVISNMKDLLKIIELFAGERTA  
GKSTPFVFPQELVDSLSPVWVHGGDAE

>FOMH-2082257\_Sint

MKYSPRTMRLALVALFSQRSATGFIVSSSPHSSFSALASRATSTVAAVDSISEASSLRQ  
AGKQHRNGARTLDSMPGSSHGRATSALRVIPGGFTDAESALKKLMAEDFGANVEVDPKRV  
AVLFDFTIGDTETPAMEVAYWELAPYFPAAAKGEELQDMSEFIRNNAGKAFEFMLEVC  
EEDRKAAGLPDIATVRADAAEDPEIMKVVDENRAKYGLKPLGELRAAGALKDILTQQKEE  
TVEALSVVARPTNGMVEALDELKKRNLPFAIATTSPKPRVPASVHACGLDDYFPPGKIHS  
GESDFNPPRFKPDPSVYLKAAQFEGVLPPLSVAVEDSASGVGSADAADMGMIVGYVGASH  
ITDERKAEHANTLRLRGARVINNMKDLIPLVDCFNECMAKGEDYCAPIAKVIETLDKDS  
VWE

>JGGD-2000240\_Smut

MEKASAYKDMSILFDFDGTIGDTETPAMEVAFWELAPYFPNTRPEQLEGLMPEFIRNNAG  
KAFEFMVEKVNEDRKSAGLGTVEEFAAKSEPKEMLDATDPHRKKFGLKTFaelraeggg

EAETILIQKTETVDALSIAQPCPGVREVLVALREAGIAFCISTTSPKPRVPASITACG  
LDEYFPIEKVHSGESDFTPEFKPSPAVYLKAAESEGKEPSNCIAVEDSGSGVGSASNAG  
VGLIVGYVGASHIKDDRKEAHAKMLMSGEKSKNGKGAEIVISNMKDLLKIELFAGERTA  
GKSSPFVFPKELVDSLSPVWVHDGDAE

>JGGD-2080538\_Smut

MKYSSRTMRLAVVALFSQRSATAFIVSSSPHSSYLSALASRATSTVAAVDSVSEASSLRQ  
AGKQHRNGARTLDSMPGSSHGAAASVLCALPGGFTDAETALKKLMEEDFGANVEVDPKRV  
AVLDFDGTIGDTETPAMEVAYWELAPYFPAAAKGEELQDMSEFIRNNAGKAFEFMLEVC  
EEDRKAAGLPDIAAVRAQAAEDPEIMKIVDENRAKYGLKSLGELRAAGALKDILTQQKEE  
TVEALSVMARPTKGMVEALDELKKRNLPFAIATTSPKPRVPASVHACGLDDYFPPEKIHS  
GESDFNPPRFKPDPSVYLKAAQFEGVLPPLSVAVEDSASGVGSADAADMGMIVGYVGASH  
ITDERKAEHANTLRLRGARVVINNMKDLIPLVDCFNECMSKGEDYCAPIAKVIETLDKDS  
VWE

>YRMA-2002970\_Sthu

MEKASAYKDMISILDFDGTIGDTETPAMEVAFWELAPYFPNTRPEQLEGLMPEFIRNNAG  
KAFEFMVEKVDEDRKSAGLGTVEEFAAKSEPKEMLDATDPHRKKFGLKTFaelraeggg  
EAETILIQKTETVDALSIAQPCPGVREVLVALREAGIAFCISTTSPKPRVPASITACG  
LDEYFPIEKVHSGESDFTPEFKPSPAVYLKAAKSEGKEPSNCIAVEDSGSGVGSASNAG  
VGLIVGYVGASHIKDDRKEAHAKMLMSGEKSKNGKGAEIVISNMNDLLKIELFAGERTA  
GKSTPFVFPKELVDSLSPVWVHSGDAE

>YRMA-2105805\_Sthu

MKYSSRTMRLAVVALFSQRSATAFIVSSSPHSSYFSALASRATSTVAAVDSVSEASSLRQ  
AGKQNRNGARALDMSGSSHGRTSALCAIPGGFTDAESALKKLMAEDFGANVEVDPKRV  
AVLDFDGTIGDTETPAMEVAYWELAPYFPAAAKGEELQDMSEFIRNNAGKAFEFMLEVC  
EEDRKAAGLPDIATVRAEAAEDPEIMKIVDENRAKYGLKSLGELRAAGALKDILTQQKEE  
TVEALSVMARPTKGMVEALDELKKRNLPFAIATTSPKPRVPASVHACGLDDYFPPEKIHS  
GESDFNPPRFKPDPSVYLKAAQFEGVLPPLSVAVEDSASGVGSADAADMGMIVGYVGASH  
ITDERKAEHANTLRLRGARVVINNMKDLIPLVDCFNECMSKGEDYCAPIAKVIETLDKDS  
VWE

>HFIK-2009162\_Svac

MEKASAYKDMISILDFDGTIGDTETPAMEVAFWELAPYFPNTSPEQLESLMPEFIRNNAG  
KAFEFMVEKVNEDRKSAGLGTVEEFAAKSESKEMLDATDPHRKKFGLKTFaelraeggg  
EAETILIQKTETVDALSIAQPCPGVREVLVALREAGIAFCISTTSPKPRVPASITACG  
LDEYFPIEKVHSGESDFTPEFKPSPAVYLKAAKSEGKEPSNCIAVEDSGSGVGSASNAG  
VGLIVGYVGASHIKDDRKEAHAKMLMSGEKSKNGKGAEIVISNMKDLLKIELFAGERTA  
GKSTPFVFPQELVDSLSPVWVHGGDAE

>HFIK-2068508\_Svac

MKYSSRTMRLAAVALCSQRSATGFIVSSSPHSSSFSTLASRATSTVAAVDSISKASSLRQ  
AGKQHRNGARALDSMPGSSHGRTSALCAIPGGFTDAESALKKLMAEDFGANVEVDPKRV  
AVLDFDGTIGDTETPAMEVAYWELAPYFPAAAKGEELQDMSEFIRNNAGKAFEFMLEVC  
EEDRKAAGLPDIATVRAEAAEDPEIMKIVDENRAKYGLKPLGELRAAGALKDILTQQKEE  
TVEALSVMARPTKGMVEALDELKKRNLPFAIATTSPKPRVPASVHACGLDDYFPPGKIHS  
GESDFNPPRFKPDPSVYLRAAQFEGVLPPLSVAVEDSASGVGSADAADMGMIVGYVGASH  
ITDERKAEHANTLRLRGARVVINNMKDLIPLVDCFNECMAKGEDYCAPIAKVIETLDKDS  
VWE

>JCXF-2013549\_Slom

MSLDKAKAFDKMSILDFDGTIGDTETPAMEVAFWELAPYLPDTPDKLDGLMPEFVRDN  
AGKAFEFMVEKVEEDRKAAGMSTIEEAFKAKSEPKEMLDAVDPHRKKFGLKTFaelraeg  
GGEKEDLLIQKTETVEALSIAQPCNGVPEVLAALTAAGVAFICISTTSPKPRVPASITA  
CKLDEYFPADKVHSGESDFDPPRFKPNPSVYLKAAETEGKEPVNCIAVEDSGSGVGSASN  
AGVGLTVGYVGASHIPDFKMDTHAEMLMAGGRAENGKGAEIVISDMTDLLKIIDFFAGEK

TAGKSAPFEFPPDLVSSLKKPVVWHGSKA

>JCXF-2007460\_Slom

MAMKRTMQAAAVLCYHRGATAFVLSSSPSSLLRRTSSPTTAAAAAAXHVSASSQQQQQ  
RCRSSRAGAVGGVPLGAGAEGEVQEDGLTDEERALRALLKEDFGANVEVDPKRVAVLFD  
FDGTIGDTETPAMEVAYWELAPYFPEAAKGGKLTDLTEYVRNNAGKAFFMLEVVEEDRK  
TQGLPDIATARAEGAEDPEVMKVVDDEARAKYGLKPLGELRAAGTLKDILTQQKEETVEAL  
SVVARPVEGMVNALDELKARKLPFAIATTSPKPRVPASVHACGLDDYFPADKIHSGESDF  
DPPRFKPDPSVYLRAAQYEGALPPLCVAVEDSASGVGSAYAAEMGLIVGYVGASHISESR  
KNEHAKMLRTRGARVVVNDMKDLIPLVDCFTECMAKGEDFCLPIANLVRTMDTKRVWE

>ULXR-2014755\_Sdot

MSLDKAKAFDKMSILFDFDGTIGDTETPAMEVAFWELAPYLPDTSPDKLDGLMPEFVRDN  
AGKAFFMVEKVEEDRKAAGMPTIEEVFAKSEPKEMLDAVDPHRKKFGLKTFaelRAEG  
GGEKENLLIQKTETVEALSIAQPCDGVPEVLAALTAAGVPFCISTTSPKPRVPASITA  
CKLDEYFPADKVHSGESDFDPPRFKPNPSVYLKAAETEGKDPVNCAVEDSGSGVGSASN  
AGVGLTVGYVGATHIPDWKMDTHAEMLMAGGRAENGKGAEIVISDITDLLKIIDFFAGEK  
TAGKSAPFEFPPDLVSSLKKPVVWHGSKA

>ULXR-2069055\_Sdot

MAMKRTMQAAAVLCYHRGATAFVLSSSPSSLLRRTSSPATAAAPAAAHVSASSQQQQR  
SSPAGAVGGVSPGAGAEGEAQEDGLTDEERALRALLKEDFGANVEVDPKRVAVLFD  
TIGDTETPAMEVAYWELAPYFPEAAKGGKLTDLTEYVRNNAGKAFFMLEVVEEDRKAQ  
LPDIATARAEGAEDPEVMKVVDDEARAKYGLKPIGELRAAGTLKDILTQQKEETVEALS  
ARPVEGMVNALDELKARKLPFAIATTSPKPRVPASVHACGLDDYFPADKIHSGESDFDPP  
RFKPDPSVYLRAAQYEGALPPLCVAVEDSASGVGSAYAAEMGLIVGYVGASHISESRKNE  
HAKMLRTRGARVVVNDMKDLIPLVDCFTECMAKGEDFCLPIANLRTMDTKRVWE

>FIDQ-2007939\_Upin

MEKASANKNISILFDFDGTIGDTETPAMEVAFWELAPYLPDTTPDKLDALMPEFVRDNAG  
KAFEFMVDTVDEERKAKGMDSIQESFAAKSEPQNMLDAVDPHRKKFGLKTFaelRAPDGG  
ELETLLVQKTETVDALSIAQPCNGVRDVLAAALTAAGVAFICISTTSPKPRVPASITACG  
LDEYFPPDKVHSGESDFDPPRFKPNPSVYLKAAETEGKEPVNCAVEDSGSGVGSASNAG  
VGLTVGYVGASHIPEYKDDTHAEMLMAGGRAENGKGAEIVISDMKDLLKIIDFFAGEKTA  
GKTAPFDFPTDMVASMQQPVVWHGKKA

>FIDQ-2071780\_Upin

MRRTFQAAAVLCYHRSATAFVSPSASLPSGVTTQRRASTSRFSWQQGSLNEQRHDS  
SASRKASSPARSALRASLDSGAEAMKKLFKEDFGSKATVDPKRVAVLFD  
PAMEVAYWELAPYFPAAATGGDLMDMSEYVRNNAGKAFFMLEVVEADRKEQGLPDIATA  
RAEAAEHPEIMKVVDAAERAKYGLKPLGDLRAAGTLKDILTQQKEETVDALS  
VNALDELARARKLPFAIATTSPKPRVPASVHACGLDDYFPADKIHSGESDFDPPRFKPDPS  
VYLRAAQYEGALPPLCVAVEDSASGVGSAAEMGLIVGYVGASHISAARKSEHAKMLRH  
RGARVVVDEMKDIALVDCFAECMAKGVDFCLPIATVIETLDPKRVWG
